# Supplementary material for: Tuning of plasmonic surface lattice resonances: on the crucial impact of the excitation efficiency of grazing diffraction orders
Source: Royal Society of Chemistry journal article supplement (doi:10.1039/d4nr02364a), 2024-11-29
Supplement: d4nr02364a1.pdf [file d4nr02364a1.pdf]

## Tuning of plasmonic surface lattice resonances: on the crucial impact of the excitation efficiency of grazing diffraction orders

Lynda Dehbi,<sup>†</sup> Kartikey Pandey,<sup>‡</sup> Macilia Braïk,<sup>†</sup> Stéphanie Lau-Truong,<sup>‡</sup> Abderrahmane Belkhir,<sup>†</sup>  
Sarra Gam-Derouich,<sup>‡</sup> Alexandre Chevillot-Biraud,<sup>‡</sup> Claire Mangeney,<sup>¶</sup> Abdelaziz Mezeghrane,<sup>†</sup> Fadi  
Issam Baida,<sup>§</sup> and Nordin Félidj<sup>\*,‡</sup>

<sup>†</sup>*Université Mouloud Mammeri de Tizi Ouzou, LPCQ, BP 17 RP, 15000 Tizi-Ouzou, Algeria*

<sup>‡</sup>*Université Paris Cité, ITODYS, CNRS, F-75006 Paris, France*

<sup>¶</sup>*Université Paris Cité, CNRS, Laboratoire de Chimie et de Biochimie Pharmacologiques et  
Toxicologiques, F-75006 Paris, France*

<sup>§</sup>*Université de Bourgogne Franche-Comté, FEMTO-ST, CNRS, 25030 Besançon Cedex, France*

E-mail: [nordin.felidj@u-paris.fr](mailto:nordin.felidj@u-paris.fr)

### Supporting information

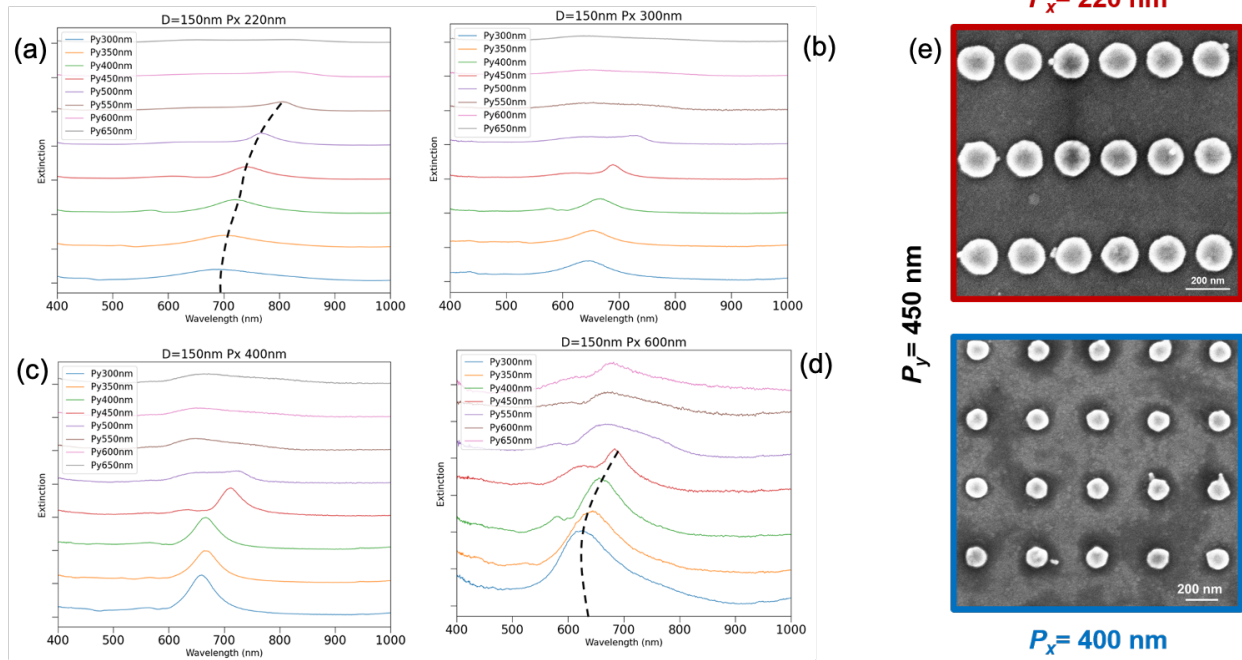

Figure SI 1: Experimental extinction spectra of rectangular array of gold disk of  $D=150\text{nm}$  and period  $P_x =$  (a) 220nm, (b) 300nm, (c) 400nm and (d) 600nm, the black dotted line in (a) and (d) depict the shift of resonance response with change in  $P_y$

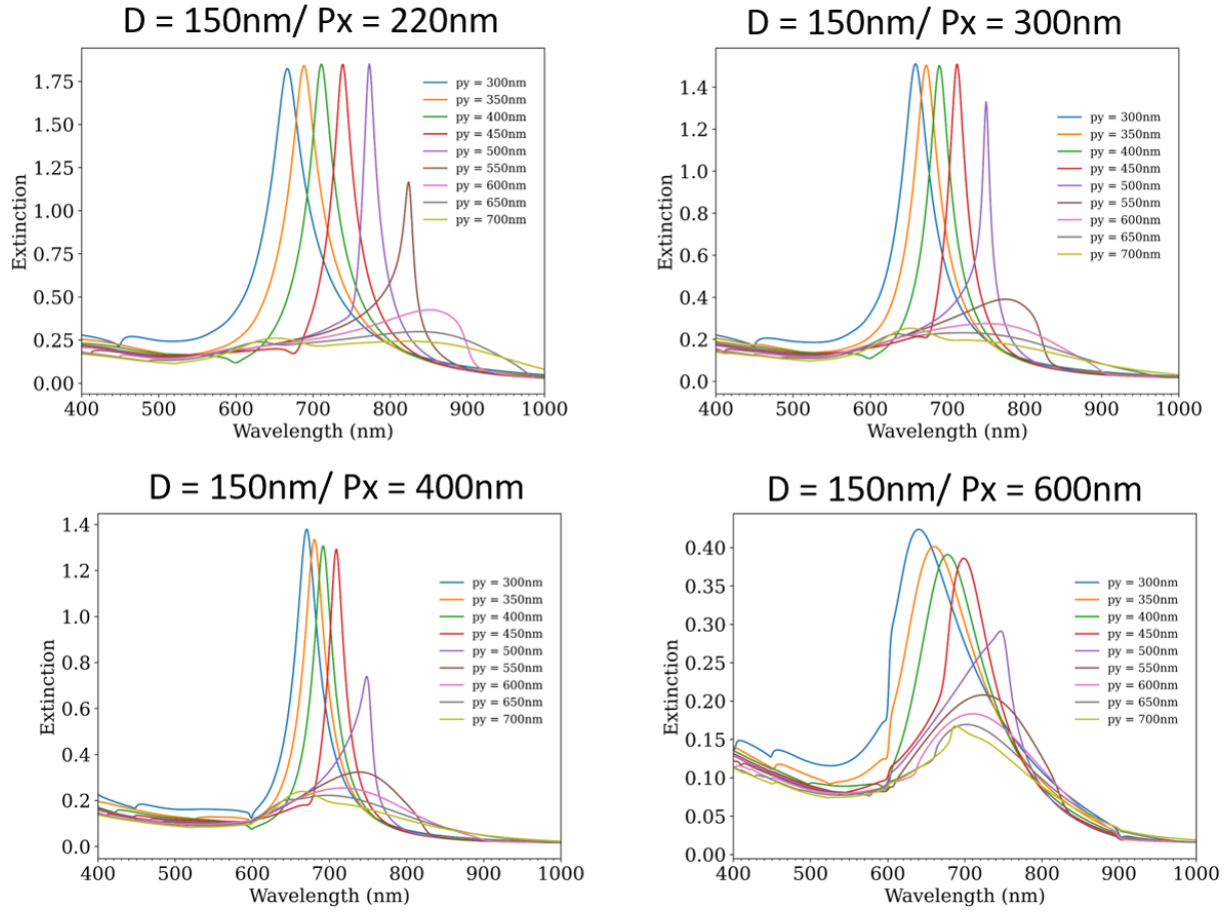

Figure SI 2: ((a-d) calculated extinction spectra of the rectangular arrays of gold disks of diameter  $D=150\text{nm}$  and height  $h=50\text{nm}$  deposited on a glass substrate coated by a thin ITO layer for fixed  $P_x = 220\text{nm}$ ,  $300\text{nm}$ ,  $400\text{nm}$  and  $600\text{nm}$ , in this order. The polarization direction is along the X axis.

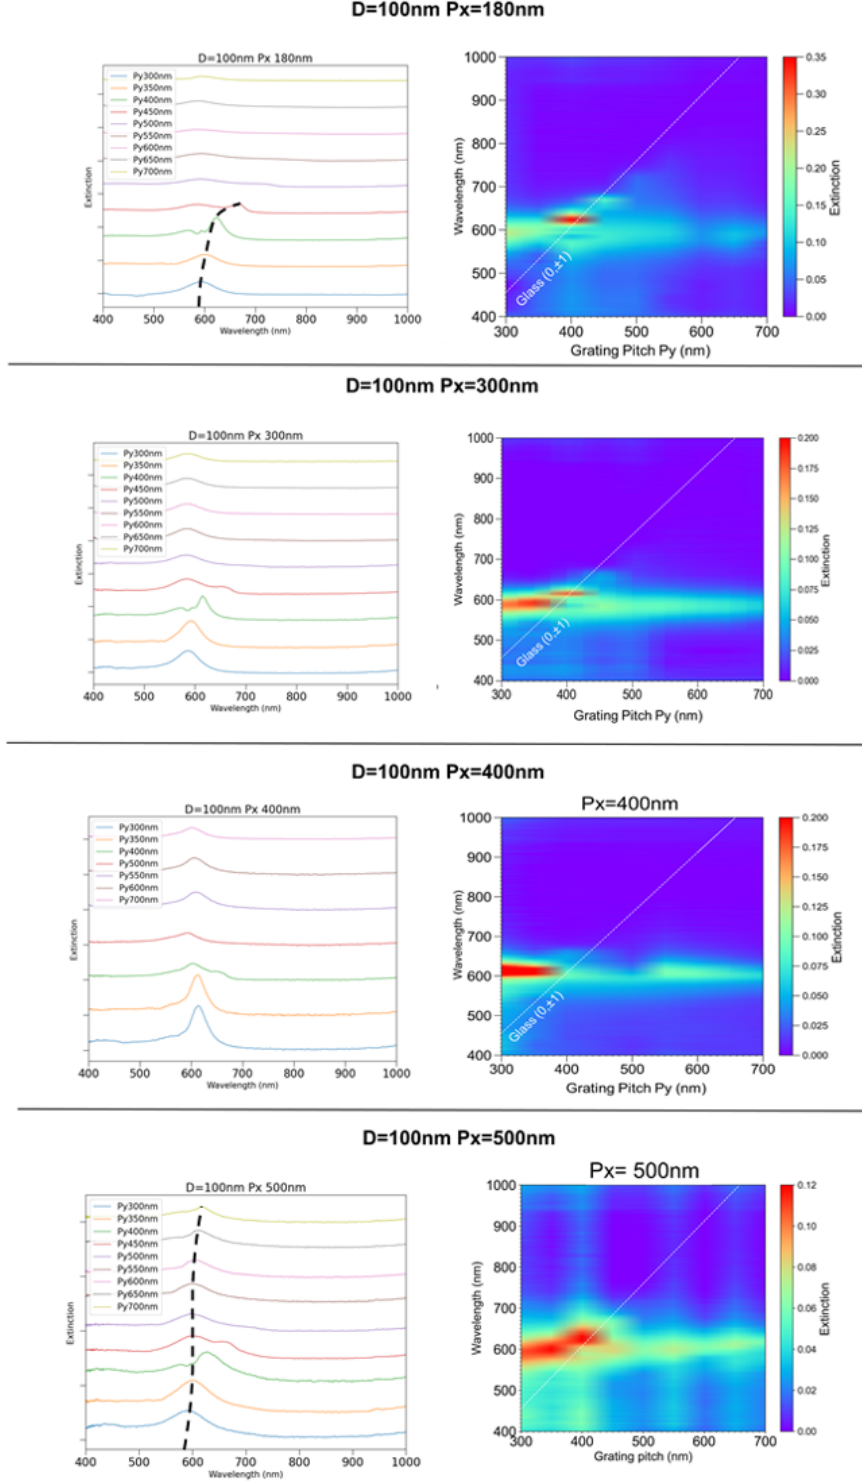

Figure SI 3: (a-d) Experimental Extinction and dispersion diagrams of the rectangular arrays of  $D=100\text{nm}$  for fixed  $P_X =$  (a)  $160\text{nm}$ , (b)  $180\text{nm}$ , (c)  $300\text{nm}$  and (d)  $400\text{nm}$ , respectively. The polarization direction is along the X axis. For the extinction spectra, the black dotted line in (a) and (d) depict the shift of resonance response with change in  $P_y$ . Meanwhile for the dispersion diagram, the Rayleigh anomaly position is displayed in a white line for the  $(0, \pm 1)$  orders in the substrate.

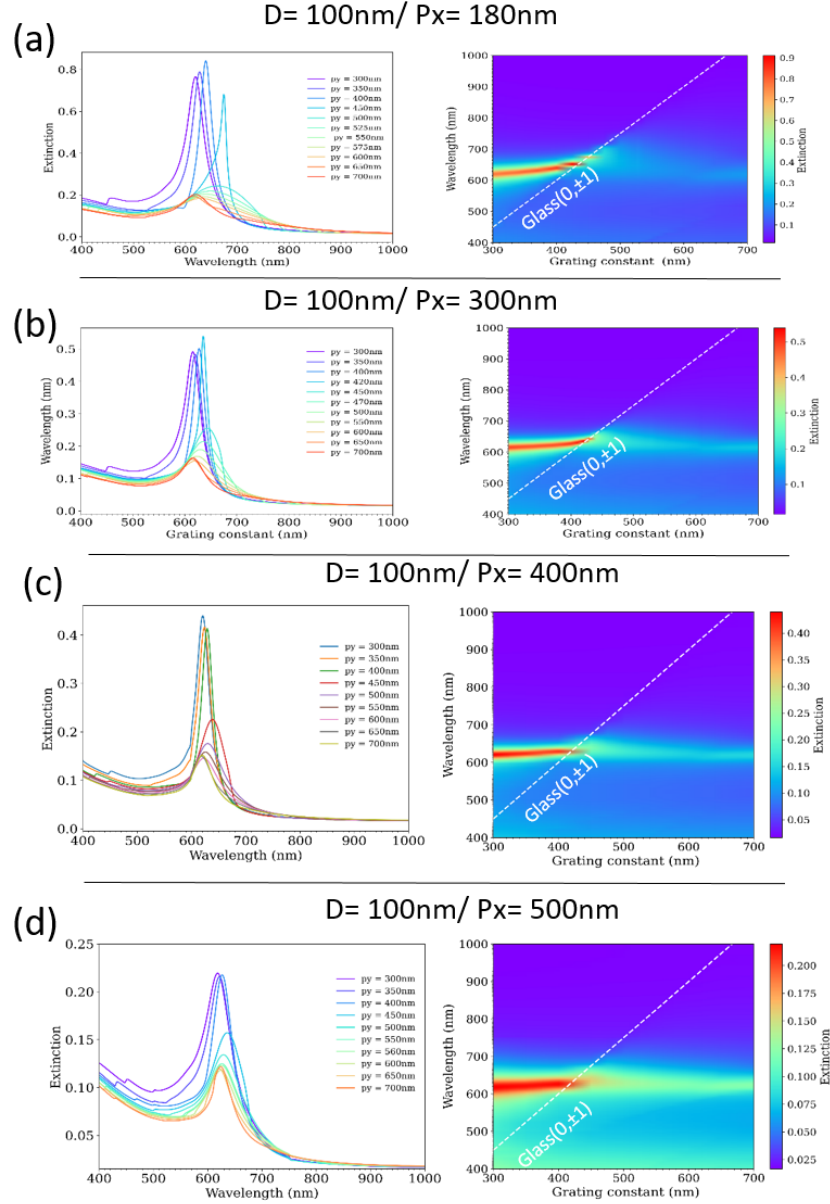

Figure SI 4: (a-d) Calculated extinction and dispersion diagrams of the rectangular arrays of  $D = 100\text{nm}$  for fixed  $P_x =$  (a)180nm,(b)300nm,(c)400nm and (d)500nm ,respectively. The polarization direction is along the X axis. For the dispersion diagram, the Rayleigh anomaly position is displayed in a white line for the  $(0, \pm 1)$  orders in the substrate.

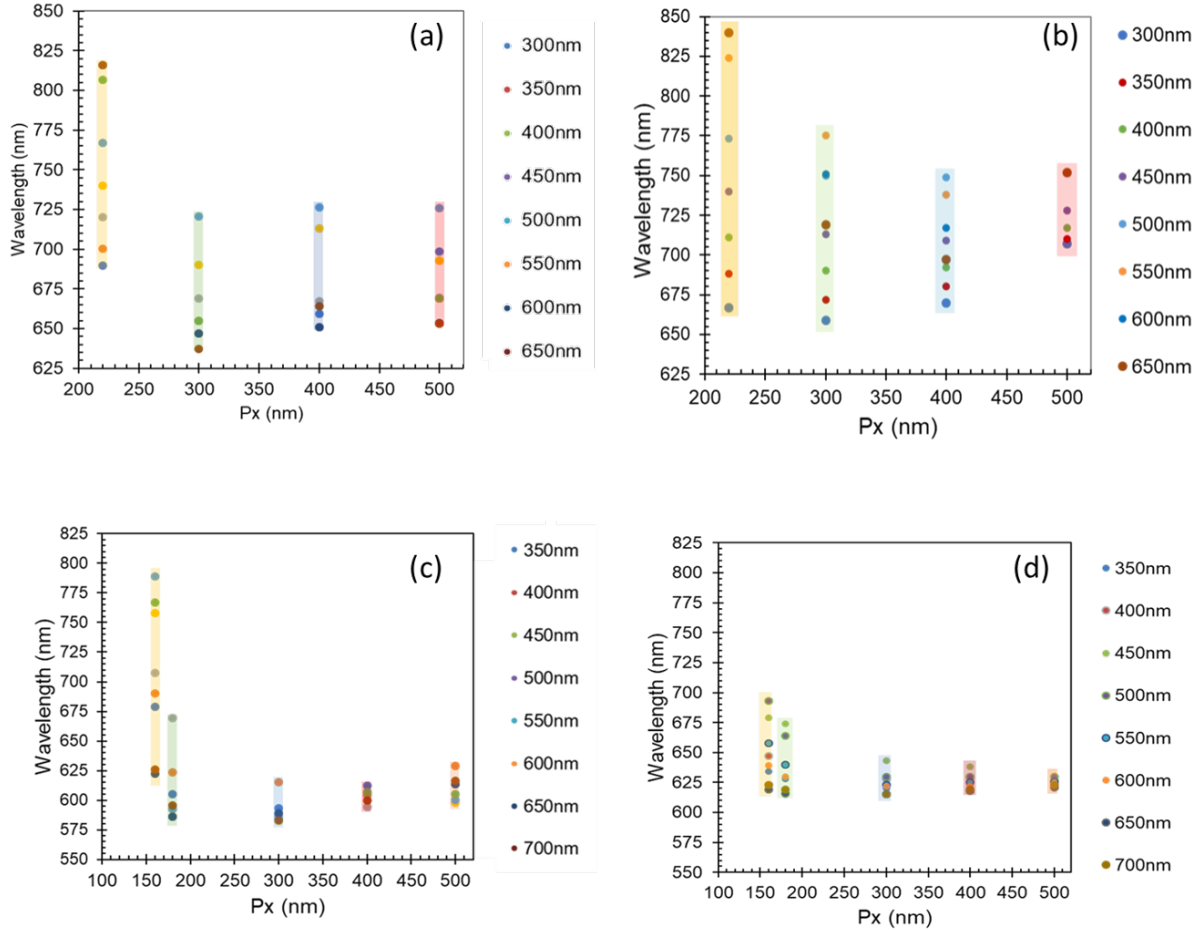

Figure SI 5: Spectral range of the red-shift in the SLR when varying the grating constant  $P_Y$  for different  $P_X$  values: (a) and (b): experimental and calculated SLR wavelengths for arrays with disks of  $D=150$  nm, respectively. (c) and (d): experimental and calculated SLR wavelengths for arrays with disks of  $D=100$  nm, respectively. It demonstrates that as  $P_X$  increases, the magnitude of the SLR red-shift decreases with variations in  $P_Y$ .

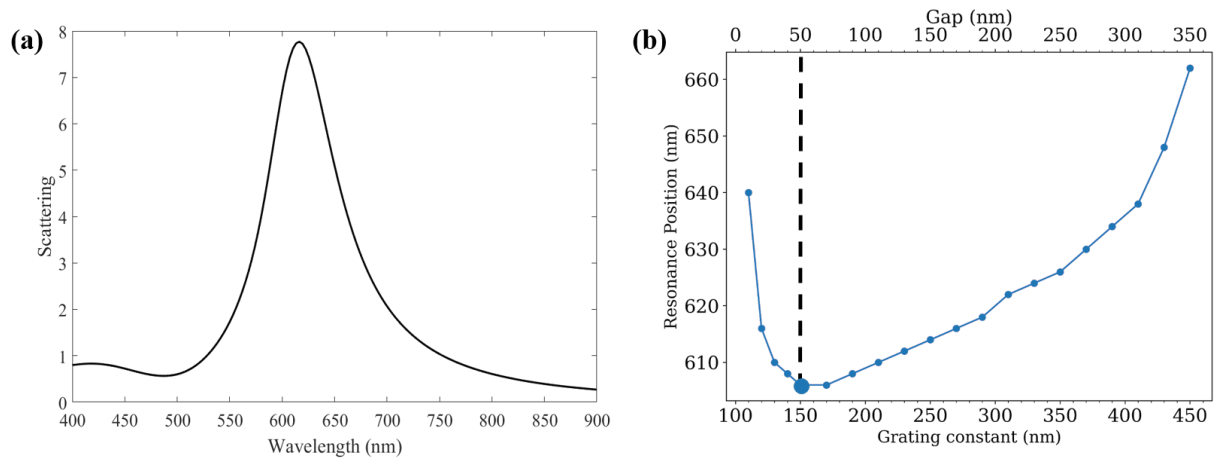

Figure SI 6: (a) Calculated scattering efficiency spectrum of a single gold nanodisk. (b) Resonance wavelengths of square arrays of the same gold nanodisks as a function of the gratings' constant. The nanodisks have a diameter  $D=100\text{nm}$  and height  $H=50\text{nm}$  and are deposited on a glass substrate and surrounded by air.
